# Supplementary material for: Faba Bean (Vicia faba L.) Variety Evaluation for Disease Resistance, Yield, and Agronomic Traits in South Gondar, Ethiopia
Source: Hindawi journal article supplement (doi:10.1155/2024/5490629), 2024-03-11
Supplement: f1 [file 5490629.f1.docx]

Supplementary materials

S1 Table. Mean squares of values of combined analysis of variance for yield and yield components of faba bean varieties grown at Lay Gayint in the 2020 and 2021 main cropping seasons

| Source of variation | df | DF | DM | NBP | PH(cm) | NPP | NSPP | HSW(g) | GY(Kg ha-1) |
| --- | --- | --- | --- | --- | --- | --- | --- | --- | --- |
| year | 1 | 46.69** | 393.36** | 2.151** | 7921.0** | 118.81** | 30.67** | 220.02ns | 125020389** |
| Replication (year) | 4 | 0.55ns | 4.88ns | 0.1311ns | 5.13ns | 0.15ns | 0.07ns | 186.13ns | 1874593ns |
| Variety (var) | 5 | 432.85** | 174.72** | 1.011** | 209.952** | 22.53** | 29.88** | 665.38** | 241072918** |
| Var*Year | 5 | 11.42** | 231.03** | 0.15* | 57.08** | 1.05** | 0.85** | 232.09* | 3303651* |
| Error | 20 | 0.72 | 8.75 | 0.05 | 6.54 | 0.24 | 0.13 | 68.83 | 1202203 |
| R2 (%) |  | 99.36 | 93.30 | 88.32 | 98.60 | 98.01 | 99.85 | 80.78 | 98.25 |
| CV (%) |  | 1.43 | 2.27 | 15.91 | 2.66 | 7.66 | 8.08 | 9.71 | 7.35 |

DF= Days to flowering, DM = days to maturity, NBP = number of branches per plant TN = tiller number, PH = plant height, NPP= number of pod per plant, NSPP = number seed per pod, HSW =hundred seed weight, GY=grain yield. R2 = coefficient of determination, CV=coefficient of variation, ** = significant difference at 0.01, * = significant difference at 0.05, ns = non- significant difference

S2 Table. Mean square of combined analysis of variance values for disease severity and AUDPC for faba bean varieties grown at Lay Gayint in the 2020 and 2021 main cropping seasons

| Source of variation | Degree of freedom | Mean squares of PSI and AUDPC of Faba bean disease | | | |
| --- | --- | --- | --- | --- | --- |
| Chocolate spot | | Faba bean gall | |
| PSI | AUDPC | PSI | AUDPC |
| Year | 1 | 3155.06** | 1129678.46** | 443.24** | 24234.18* |
| Rep (Year) | 4 | 1.13ns | 27139.43ns | 0.22ns | 662.76ns |
| Variety(V) | 5 | 336.26** | 96118.99** | 62.51** | 30400.33** |
| V* Year | 5 | 83.99** | 66987.37** | 76.68** | 113078.08** |
| Error | 20 | 0.54 | 12201.26 | 1.62 | 3777.88 |
| R2 (%) |  | 99.97 | 89.38 | 97.23 | 90.78 |
| CV (%) |  | 1.87 | 9.47 | 5.20 | 7.15 |

PSI = percent severity index, AUDPC = area under disease progress, R=, coefficient of determination, CV= coefficient of variation, ** = significant difference at 0.01, * = significant difference at 0.05, ns = non- significant difference
